# Supplementary material for: Conservation and Variability of Dengue Virus Proteins: Implications for Vaccine Design
Source: PLoS Negl Trop Dis. 2008 Aug 13;2(8):e272. doi: 10.1371/journal.pntd.0000272 (PMC2491585; doi:10.1371/journal.pntd.0000272)
Supplement: Table S4 — Distribution of pan-DENV sequences in nature. (0.12 MB DOC) [file pntd.0000272.s006.doc]

| DENV  protein | Pan-DENV sequencea | Species (#)b | Percentage representation (%) | number of sequence analyzedc | | | | | | | | | | | | | |
| --- | --- | --- | --- | --- | --- | --- | --- | --- | --- | --- | --- | --- | --- | --- | --- | --- |
| LEV | WNV | JEV | MVE | UV | KBV | IH | TBEV | LV | OMSK | LIV | PV | KFDV | YFV |
|  |  |  |  |  |  |  |  |  |  |  |  |  |  |  |  |  |
| E | 97VDRGWGNGCGLFGKG111 | 19 | 97|77 | 97|276 | 97|250 |  |  |  |  |  |  |  |  |  |  | 82|179 |
|  |  |  |  |  |  |  |  |  |  |  |  |  |  |  |  |  |
| NS1 | 12ELKCGSGIF20 | 2 |  |  |  |  |  |  |  |  |  |  |  |  |  |  |
| 294RGPSLRTTT302 | 3 |  |  | 3|58 |  |  |  |  |  |  |  |  |  |  |  |
| 325GEDGCWYGMEIRP337 | 10 | 90|30 | 96|138 | 31|186 |  |  |  |  |  |  |  |  |  |  |  |
|  |  |  |  |  |  |  |  |  |  |  |  |  |  |  |  |  |
| NS3 | 46FHTMWHVTRG55 | 23 |  |  |  |  |  |  |  | 89|19 |  |  |  |  |  | 87|23 |
| 256EIVDLMCHATFT267 | 3 |  |  |  |  |  |  |  |  |  |  |  |  |  |  |
| 284MDEAHFTDP292 | 10 |  | 99|134 | 98|54 |  |  |  |  |  |  |  |  |  |  |  |
| 296AARGYISTRV305 | 3 | 9|98 | 4|137 |  |  |  |  |  |  |  |  |  |  |  |  |
| 313IFMTATPPG321 | 11 | 96|26 | 100|134 | 98|53 |  |  |  |  |  |  |  |  |  |  |  |
| 357GKTVWFVPSIK367 | 8 |  | 94|141 |  |  |  |  | 17|12 |  |  |  |  |  |  |  |
| 383VIQLSRKTFD392 | 1 |  |  |  |  |  |  |  |  |  |  |  |  |  |  |
| 406VVTTDISEMGANF418 | 35 | 34|77 | 91|146 | 21|248 |  |  |  |  | 68|25 |  |  |  |  |  |  |
| 491EAKMLLDNI499 | 1 |  |  |  |  |  |  |  |  |  |  |  |  |  |  |
|  |  |  |  |  |  |  |  |  |  |  |  |  |  |  |  |  |
| NS4b | 223ANIFRGSYLAGAGL236 | 1 |  |  |  |  |  |  |  |  |  |  |  |  |  |  |
|  |  |  |  |  |  |  |  |  |  |  |  |  |  |  |  |  |
| NS5 | 6GETLGEKWK14 | 4 |  |  |  |  |  |  |  |  |  |  |  |  |  |  |
| 79DLGCGRGGWSYY90 | 37 | 77|35 | 96|140 | 20|244 |  |  |  |  | 82|38 |  |  |  | 83|18 | 40|10 | 78|27 |
| 104TKGGPGHEEP113 | 9 | 93|28 | 89|148 |  |  |  |  |  |  |  |  |  |  |  |  |
| 141DTLLCDIGESS151 | 13 |  | 100|134 | < 1|268 |  |  |  |  |  |  |  |  |  |  | 84|25 |
| 209PLSRNSTHEMYW220 | 31 | 90|29 | 100|134 |  |  |  |  |  | 61|28 |  |  |  | 100|17 |  | 95|22 |
| 302TWAYHGSYE310 | 1 |  |  |  |  |  |  |  |  |  |  |  |  |  |  |
| 342AMTDTTPFGQQRVFKEKVDTRT363 | 29 | 33|79 | 50|272 | 18|289 | 18|17 | 23|13 |  | 25|12 | 32|34 |  |  |  | 60|45 |  | 51|41 |
| 450CVYNMMGKREKKLGEFG466 | 35 | 24|103 | 33|344 | 69|74 | 20|15 |  | 7|14 | 14|14 | 63|27 |  |  | 11|19 | 41|41 |  | 23|90 |
| 468AKGSRAIWYMWLGAR482 | 44 | 32|19 |  |  |  |  |  | 62|13 | 82|22 | 42|12 |  |  | 41|41 |  | 11|208 |
| 531YADDTAGWDTRIT543 | 59 | 90|30 | 73|193 | 88|58 |  |  |  | 80|10 | 69|26 |  | 93|14 |  | 84|19 |  | 85|26 |
| 658RMAISGDDCVVKP670 | 27 | 73|37 | 50|272 | 95|55 | 50|10 |  |  |  |  |  |  |  | 47|34 |  | 3|37 |
| 707VPFCSHHFH715 | 33 |  |  |  |  |  |  |  | 100|19 |  | 100|13 |  | 76|17 |  | 95|22 |
| 765LMYFHRRDLRLA776 | 37 | 64|42 | 91|151 | 83|59 |  |  |  | 44|18 |  |  |  |  |  |  |  |
|  |  |  |  |  |  |  |  |  |  |  |  |  |  |  |  |  |

a Amino acid positions numbered according to the sequence alignments of the 4 DENV types

b Species (#) column indicates the number of viral species that shared at least 9 consecutive amino acids of the pan-DENV sequence

c Percentage representation (rounded to whole number) of the pan-DENV sequences is only shown for viral species with ≥ 10 total sequences reported at the NCBI Entrez protein database. These viral species included: LEV, *St. Louis encephalitis virus*; WNV, *West Nile virus*; JEV, *Japanese encephalitis virus*; MVE, *Murray Valley encephalitis virus*; UV, *Usutu virus*; KBV, *Kokobera virus*; IH, *Ilheus virus*; TBEV, *Tick-born encephalitis virus*; LV, *Langat virus*; OMSK, *Omsk hemorrhagic fever virus*; LIV, *Louping ill* *virus*; PV, *Powassan virus*; KDFV, *Kyasanur forest disease* *virus*; and YFV, *Yellow fever virus*. However, despite having a total of ≥ 10 sequences reported, some of these viruses had less than 10 of the relevant conserved sequence (indicated by cells shaded in grey). Empty cells indicate no match between the pan-DENV sequences and the *Flavivirus*.
