# Supplementary material for: Conservation and Variability of Dengue Virus Proteins: Implications for Vaccine Design
Source: PLoS Negl Trop Dis. 2008 Aug 13;2(8):e272. doi: 10.1371/journal.pntd.0000272 (PMC2491585; doi:10.1371/journal.pntd.0000272)
Supplement: Table S6 — Intra-type representation of candidate putative HLA supertype-restricted nonamer peptides predicted by immunoinformatics algorithms. (0.22 MB DOC) [file pntd.0000272.s008.doc]

| DENV  protein | Pan-DENV sequence and the putative HLA supertype-restricted nonamer peptide(s)a | Intra-type representation (%)b and total sequences analyzed (#)c | | | |
| --- | --- | --- | --- | --- | --- |
| DENV-1 | DENV-2 | DENV-3 | DENV-4 |
|  |  |  |  |  |  |
| E | 97VDRGWGNGCGLFGKG111 |  |  |  |  |
| 99RGWGNGCGL107 | 98%(580) | 98%(811) | 100%(372) | 100%(320) |
| 100GWGNGCGLF108 | 99%(580) | 98%(811) | 100%(372) | 95%(320) |
|  |  |  |  |  |  |
| NS1 | 12ELKCGSGIF20 |  |  |  |  |
| 12ELKCGSGIF20 | 99%(366) | 95%(603) | 83%(201) | 99%(141) |
| 25VHTWTEQYKFQ35 |  |  |  |  |
| 26HTWTEQYKF34 | 99%(350) | 96%(555) | 100%(197) | 95%(140) |
| 193AVHADMGYWIES204 |  |  |  |  |
| 193AVHADMGYW201 | 100%(104) | 95%(197) | 98%(117) | 100%(28) |
| 194VHADMGYWI202 | 100%(104) | 96%(197) | 98%(117) | 96%(28) |
| 195HADMGYWIE203 | 100%(104) | 97%(197) | 98%(117) | 96%(28) |
| 229HTLWSNGVLES239 |  |  |  |  |
| 229HTLWSNGVL237 | 98%(124) | 97%(215) | 97%(117) | 100%(28) |
| 231LWSNGVLES239 | 97%(126) | 97%(215) | 98%(117) | 100%(28) |
| 325GEDGCWYGMEIRP337 |  |  |  |  |
| 325GEDGCWYGM333 | 98%(112) | 98%(202) | 98%(113) | 100%(28) |
| 328GCWYGMEIR336 | 100% (104) | 99%(197) | 100%(115) | 100%(28) |
|  |  |  |  |  |  |
| NS3 | 46FHTMWHVTRG55 |  |  |  |  |
| 46FHTMWHVTR54 | 100%(89) | 100%(132) | 100%(68) | 100%(28) |
| 47HTMWHVTRG55 | 100%(89) | 100%(132) | 100%(68) | 100%(28) |
| 189LTIMDLHPG197 |  |  |  |  |
| 189LTIMDLHPG197 | 100%(97) | 99%(141) | 100%(97) | 100%(29) |
| 256EIVDLMCHATFT267 |  |  |  |  |
| 256EIVDLMCHA264 | 99%(98) | 100%(137) | 100%(103) | 100%(29) |
| 257IVDLMCHAT265 | 99%(98) | 100%(137) | 100%(103) | 100%(29) |
| 258VDLMCHATF266 | 99%(98) | 100%(137) | 100%(103) | 100%(29) |
| 259DLMCHATFT267 | 99%(98) | 100%(137) | 100%(103) | 100%(29) |
| 296AARGYISTRV305 |  |  |  |  |
| 296AARGYISTR304 | 97%(90) | 100%(135) | 97%(74) | 100%(27) |
| 297ARGYISTRV305 | 97%(90) | 100%(135) | 97%(74) | 100%(27) |
| 313IFMTATPPG321 |  |  |  |  |
| 313IFMTATPPG321 | 100%(90) | 100%(135) | 100%(74) | 100%(27) |
| 357GKTVWFVPSIK367 |  |  |  |  |
| 358KTVWFVPSI366 | 99%(90) | 100%(135) | 99%(181) | 96%(27) |
| 359TVWFVPSIK367 | 99%(90) | 100%(135) | 100%(181) | 100%(27) |
| 383VIQLSRKTFD392 |  |  |  |  |
| 383VIQLSRKTF391 | 81%(90) | 99%(135) | 99%(181) | 100%(27) |
| 384IQLSRKTFD392 | 81%(90) | 99%(135) | 98%(181) | 100%(27) |
| 406VVTTDISEMGANF418 |  |  |  |  |
| 406VVTTDISEM414 | 98%(90) | 99%(135) | 98%(181) | 100%(27) |
| 407VTTDISEMG415 | 98%(90) | 99%(135) | 99%(181) | 100%(27) |
| 408TTDISEMGA416 | 98%(90) | 100%(135) | 99%(181) | 100%(27) |
| 410DISEMGANF418 | 98%(90) | 100%(135) | 99%(181) | 100%(27) |
| 537LMRRGDLPVWL547 |  |  |  |  |
| 537LMRRGDLPV545 | 99%(89) | 100%(133) | 99%(181) | 93%(27) |
| 538MRRGDLPVW546 | 99%(89) | 100%(133) | 99%(181) | 93%(27) |
| 539RRGDLPVWL547 | 100%(89) | 100%(133) | 99%(181) | 93%(27) |
|  |  |  |  |  |  |
| NS4a | 126QRTPQDNQL134 |  |  |  |  |
| 126QRTPQDNQL134 | 98%(87) | 100%(126) | 100%(70) | 100%(26) |
|  |  |  |  |  |  |
| NS4b | 35PASAWTLYAVATT47 |  |  |  |  |
| 36ASAWTLYAV44 | 100%(89) | 100%(127) | 100%(70) | 100%(27) |
| 37SAWTLYAVA45 | 100%(89) | 100%(127) | 100%(70) | 100%(27) |
| 39WTLYAVATT47 | 100%(89) | 100%(127) | 100%(70) | 100%(27) |
| 118HYAIIGPGLQAKATREAQKR137 |  |  |  |  |
| 118HYAIIGPGL126 | 100%(89) | 97%(127) | 100%(70) | 98%(109) |
| 119YAIIGPGLQ127 | 100%(89) | 97%(127) | 100%(70) | 98%(109) |
| 120AIIGPGLQA128 | 100%(89) | 97%(127) | 100%(70) | 98%(109) |
| 121IIGPGLQAK129 | 100%(89) | 97%(127) | 100%(70) | 99%(109) |
| 126LQAKATREA134 | 99%(89) | 97%(127) | 100%(70) | 100%(109) |
| 127QAKATREAQ135 | 99%(89) | 95%(127) | 100%(70) | 100%(109) |
| 128AKATREAQK136 | 99%(89) | 95%(127) | 100%(70) | 100%(109) |
| 129KATREAQKR137 | 99%(89) | 95%(127) | 100%(70) | 100%(109) |
| 139AAGIMKNPTVDGI151 |  |  |  |  |
| 142IMKNPTVDG150 | 96%(89) | 98%(127) | 97%(70) | 100%(109) |
| 143MKNPTVDGI151 | 98%(89) | 98%(127) | 97%(70) | 100%(109) |
| 223ANIFRGSYLAGAGL236 |  |  |  |  |
| 223ANIFRGSYL231 | 100%(87) | 100%(129) | 100%(70) | 98%(109) |
| 224NIFRGSYLA232 | 100%(87) | 100%(129) | 100%(70) | 100%(109) |
| 225IFRGSYLAG233 | 100%(87) | 100%(129) | 100%(70) | 100%(109) |
| 226FRGSYLAGA234 | 100%(87) | 100%(129) | 97%(70) | 100%(109) |
| 228GSYLAGAGL236 | 100%(87) | 100%(129) | 97%(70) | 100%(109) |
|  |  |  |  |  |  |
| NS5 | 6GETLGEKWK14 |  |  |  |  |
| 6GETLGEKWK14 | 92%(87) | 98%(131) | 100%(70) | 100%(109) |
| 79DLGCGRGGWSYY90 |  |  |  |  |
| 81GCGRGGWSY89 | 100%(87) | 98%(130) | 100%(78) | 100%(27) |
| 82CGRGGWSYY90 | 100%(87) | 98%(130) | 100%(80) | 100%(27) |
| 141DTLLCDIGESS151 |  |  |  |  |
| 142TLLCDIGES150 | 100%(87) | 100%(130) | 100%(74) | 100%(27) |
| 143LLCDIGESS151 | 100%(87) | 100%(130) | 100%(74) | 100%(27) |
| 209PLSRNSTHEMYW220 |  |  |  |  |
| 210LSRNSTHEM218 | 100%(87) | 100%(130) | 100%(70) | 100%(27) |
| 211SRNSTHEMY219 | 100%(87) | 100%(130) | 100%(70) | 100%(27) |
| 212RNSTHEMYW220 | 100%(87) | 100%(130) | 100%(70) | 100%(27) |
| 342AMTDTTPFGQQRVFKEKVDTRT363 |  |  |  |  |
| 343MTDTTPFGQ351 | 100%(87) | 98%(126) | 99%(165) | 96%(27) |
| 345DTTPFGQQR353 | 100%(87) | 100%(126) | 100%(165) | 96%(27) |
| 346TTPFGQQRV354 | 100%(87) | 100%(126) | 100%(165) | 96%(27) |
| 347TPFGQQRVF355 | 100%(87) | 100%(126) | 100%(157) | 96%(27) |
| 348PFGQQRVFK356 | 100%(87) | 100%(126) | 100%(157) | 96%(27) |
| 349FGQQRVFKE357 | 100%(87) | 100%(126) | 100%(157) | 100%(27) |
| 350GQQRVFKEK358 | 100%(87) | 100%(126) | 99%(157) | 100%(27) |
| 354VFKEKVDTR362 | 100%(87) | 100%(126) | 99%(157) | 100%(27) |
| 450CVYNMMGKREKKLGEFG466 |  |  |  |  |
| 450CVYNMMGKR458 | 100%(87) | 95%(126) | 97%(155) | 100%(27) |
| 451VYNMMGKRE459 | 100%(87) | 95%(126) | 97%(155) | 100%(27) |
| 452YNMMGKREK460 | 100%(87) | 97%(126) | 97%(155) | 100%(27) |
| 453NMMGKREKK461 | 100%(87) | 97%(126) | 97%(155) | 100%(27) |
| 454MMGKREKKL462 | 100%(87) | 94%(126) | 97%(155) | 100%(27) |
| 457KREKKLGEF465 | 100%(87) | 97%(126) | 99%(155) | 100%(27) |
| 458REKKLGEFG466 | 100%(87) | 97%(126) | 99%(155) | 100%(27) |
| 468AKGSRAIWYMWLGAR482 |  |  |  |  |
| 469KGSRAIWYM477 | 98%(87) | 99%(126) | 99%(155) | 100%(27) |
| 470GSRAIWYMW478 | 98%(87) | 100%(128) | 99%(155) | 100%(27) |
| 471SRAIWYMWL479 | 98%(87) | 100%(128) | 100%(155) | 100%(27) |
| 473AIWYMWLGA481 | 98%(87) | 100%(128) | 99%(157) | 100%(27) |
| 474IWYMWLGAR482 | 97%(87) | 100%(128) | 99%(157) | 100%(27) |
| 531YADDTAGWDTRIT543 |  |  |  |  |
| 531YADDTAGWD539 | 100%(87) | 100%(128) | 99%(157) | 100%(27) |
| 534DTAGWDTRI542 | 100%(87) | 100%(128) | 99%(157) | 100%(27) |
| 568IFKLTYQNKVV578 |  |  |  |  |
| 568IFKLTYQNK576 | 100%(87) | 98%(130) | 97%(159) | 100%(27) |
| 569FKLTYQNKV577 | 100%(87) | 97%(130) | 98%(159) | 100%(27) |
| 570KLTYQNKVV578 | 100%(87) | 97%(130) | 98%(159) | 100%(27) |
| 597DQRGSGQVGTYGLNTFTNME616 |  |  |  |  |
| 599RGSGQVGTY607 | 100%(87) | 88%(130) | 98%(159) | 100%(27) |
| 601SGQVGTYGL609 | 100%(87) | 88%(130) | 98%(159) | 100%(27) |
| 604VGTYGLNTF612 | 100%(87) | 88%(130) | 97%(159) | 100%(27) |
| 605GTYGLNTFT613 | 100%(87) | 88%(114) | 99%(158) | 100%(27) |
| 606TYGLNTFTN614 | 100%(87) | 98%(130) | 99%(159) | 100%(27) |
| 607YGLNTFTNM615 | 98%(87) | 98%(130) | 99%(159) | 100%(27) |
| 658RMAISGDDCVVKP670 |  |  |  |  |
| 659MAISGDDCV667 | 100%(87) | 100%(130) | 97%(159) | 100%(27) |
| 660AISGDDCVV668 | 100%(87) | 100%(130) | 97%(159) | 100%(27) |
| 661ISGDDCVVK669 | 100%(87) | 100%(130) | 97%(159) | 100%(27) |
| 707VPFCSHHFH715 |  |  |  |  |
| 707VPFCSHHFH715 | 98%(87) | 100%(130) | 100%(159) | 96%(27) |
| 765LMYFHRRDLRLA776 |  |  |  |  |
| 765LMYFHRRDL773 | 100%(87) | 98%(130) | 99%(159) | 100%(27) |
| 766MYFHRRDLR774 | 100%(87) | 98%(130) | 99%(159) | 100%(27) |
| 767YFHRRDLRL775 | 100%(87) | 98%(130) | 99%(159) | 100%(27) |
| 768FHRRDLRLA776 | 100%(87) | 98%(130) | 98%(159) | 100%(27) |
| 790PTSRTTWSIHA800 |  |  |  |  |
| 790PTSRTTWSI798 | 99%(87) | 98%(128) | 98%(157) | 100%(27) |
| 792SRTTWSIHA800 | 99%(87) | 98%(128) | 100%(157) | 100%(27) |
|  |  |  |  |  |  |

a Amino acid positions of the pan-DENV sequences and the predicted nonamers are numbered according to the sequence alignments of the 4 DENV types

b Rounded to whole number

c The total number of sequences analyzed (2005 dataset) may not match the total number of sequences collected for each protein because both partial and full-length sequences were used for the sequence alignments, with the results that some regions have more sequence information than others
